# Supplementary material for: Bioactivity-Guided Isolation and Identification of New and Immunosuppressive Monoterpenoid Indole Alkaloids from Rauvolfia yunnanensis Tsiang
Source: PubMed Central journal article supplement (PMC6943595; doi:10.3390/molecules24244574), 2019-12-13

## Supplementary data

### **Bioactivity-guided Isolation and Identification of New and Immunosuppressive Monoterpenoid Indole Alkaloids from *Rauvolfia yunnanensis* Tsiang**

Li-Mei Li<sup>1,2,\*</sup>, Shun-Dong Shi<sup>2</sup>, Yang Liu<sup>2</sup>, Qiang Zou<sup>2</sup>

<sup>1</sup> College of Pharmacy, Southwest University for Nationalities, Chengdu 610041,  
Sichuan, China

<sup>2</sup> Research Center, Chengdu Medical College, Chengdu 610500, Sichuan, China;

[shisd@kelun.com](mailto:shisd@kelun.com) (S.-D. S.); [scunn519@gmail.com](mailto:scunn519@gmail.com) (Y. L.); [qiangzou99@gmail.com](mailto:qiangzou99@gmail.com)

(Q. Z.)

\* Correspondence: [21800008@swun.edu.cn](mailto:21800008@swun.edu.cn) (L.-M. L.).

## Content

**Figure S1.**  $^1\text{H}$  NMR spectrum of compound **1** (600 MHz,  $\text{C}_5\text{H}_5\text{N}-d_5$ ).

**Figure S2.**  $^{13}\text{C}$  NMR spectrum of compound **1** (150 MHz,  $\text{C}_5\text{H}_5\text{N}-d_5$ ).

**Figure S3.** HSQC spectrum of compound **1** (600 MHz,  $\text{C}_5\text{H}_5\text{N}-d_5$ ).

**Figure S4.** HMBC spectrum of compound **1** (600 MHz,  $\text{C}_5\text{H}_5\text{N}-d_5$ ).

**Figure S5.** NOESY spectrum of compound **1** (600 MHz,  $\text{C}_5\text{H}_5\text{N}-d_5$ ).

**Figure S6.**  $^1\text{H}$  NMR spectrum of compound **2** (600 MHz,  $\text{MeOH}-d_4$ ).

**Figure S7.**  $^{13}\text{C}$  NMR spectrum of compound **2** (150 MHz,  $\text{MeOH}-d_4$ ).

**Figure S8.** HSQC spectrum of compound **2** (600 MHz,  $\text{MeOH}-d_4$ ).

**Figure S9.** HMBC spectrum of compound **2** (600 MHz,  $\text{MeOH}-d_4$ ).

**Figure S10.** NOESY spectrum of compound **2** (600 MHz,  $\text{MeOH}-d_4$ ).

**Figure S11.**  $^1\text{H}$  NMR spectrum of compound **3** (600 MHz,  $\text{MeOH}-d_4$ ).

**Figure S12.**  $^{13}\text{C}$  NMR spectrum of compound **3** (150 MHz,  $\text{MeOH}-d_4$ ).

**Figure S13.** HSQC spectrum of compound **3** (600 MHz,  $\text{MeOH}-d_4$ ).

**Figure S14.** HMBC spectrum of compound **3** (600 MHz,  $\text{MeOH}-d_4$ ).

**Figure S15.** NOESY spectrum of compound **3** (600 MHz,  $\text{MeOH}-d_4$ ).

**Figure S1.**  $^1\text{H}$  NMR spectrum of compound **1** (600 MHz,  $\text{C}_5\text{H}_5\text{N}-d_5$ ).

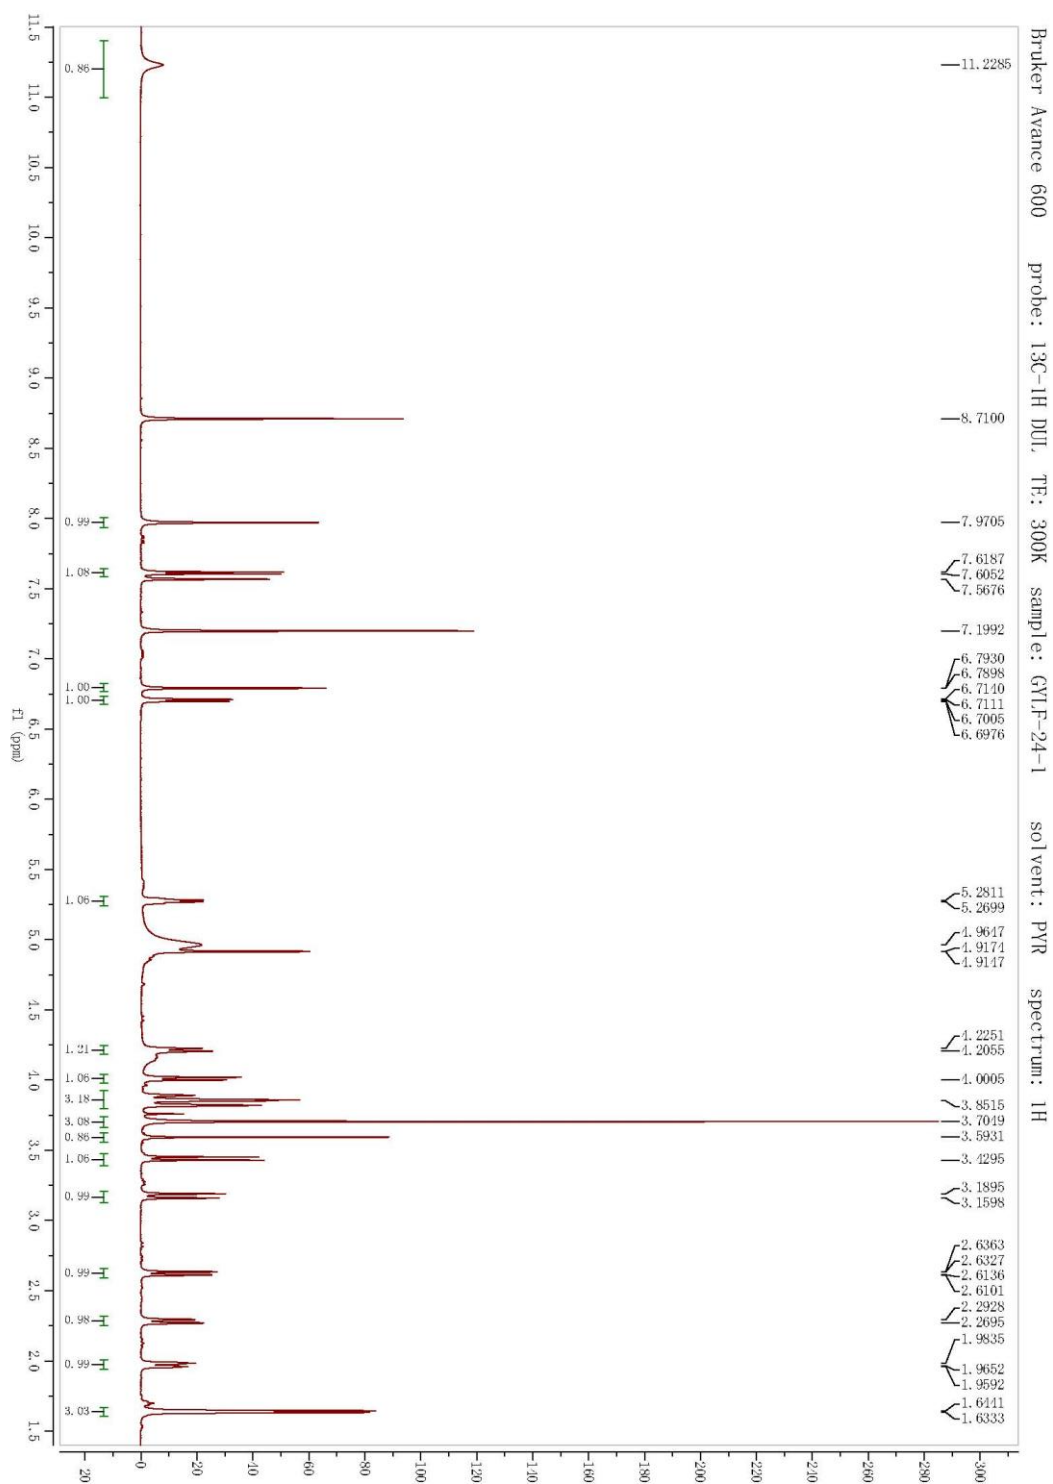

**Figure S2.**  $^{13}\text{C}$  NMR spectrum of compound **1** (150 MHz,  $\text{C}_5\text{H}_5\text{N}-d_5$ ).

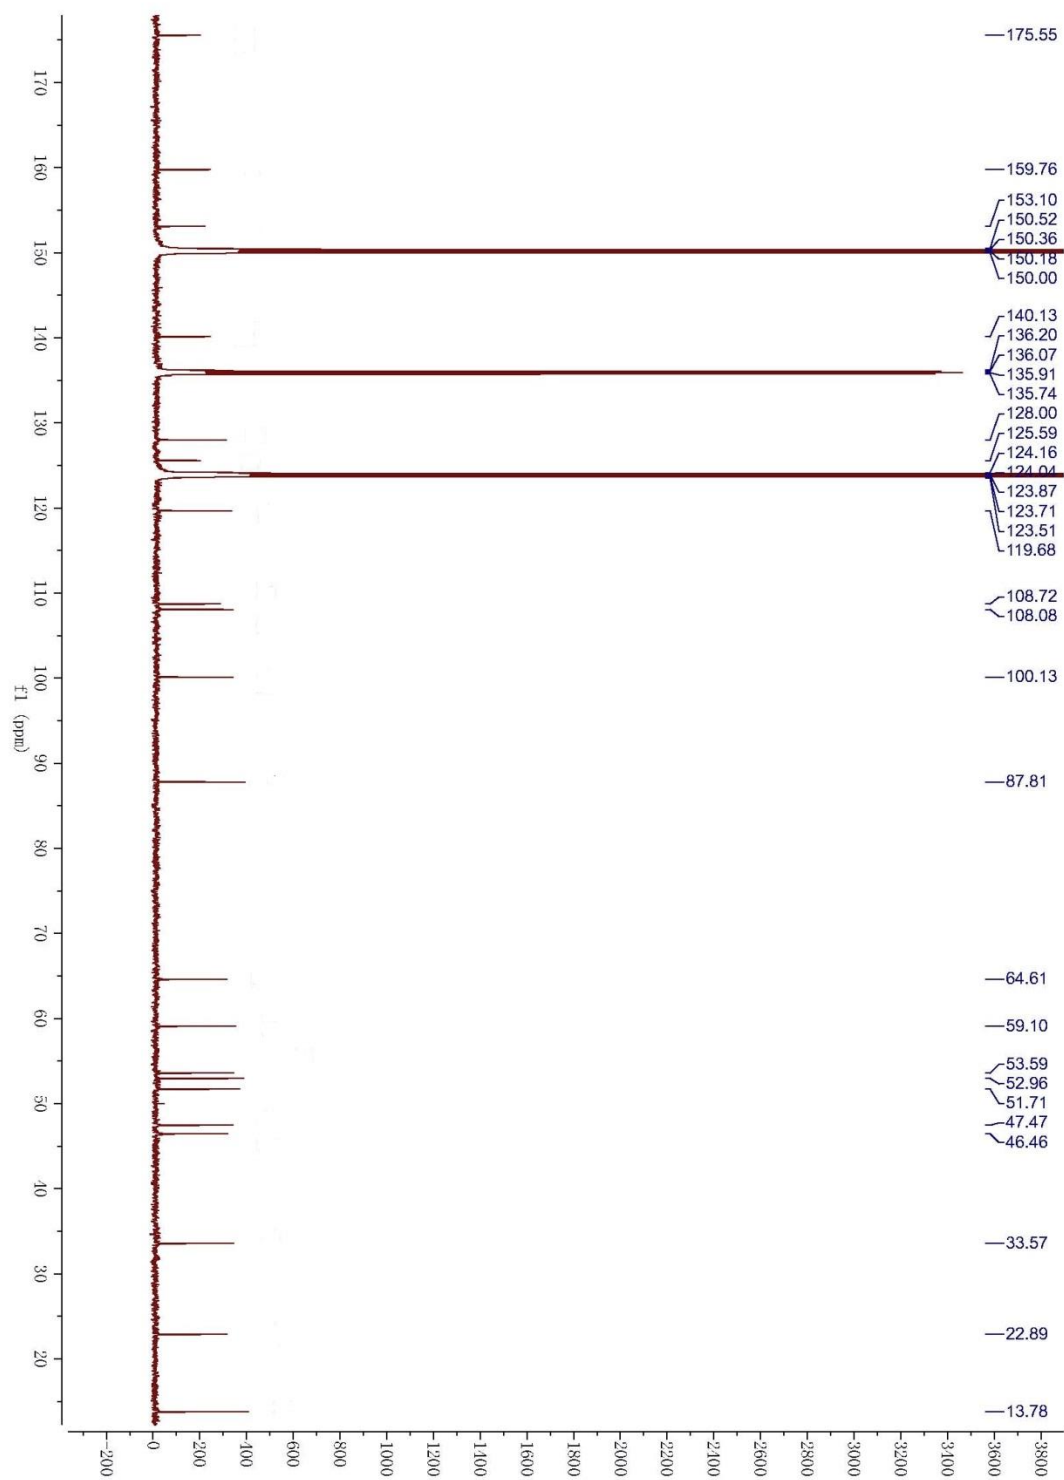

Figure S3. HSQC spectrum of compound 1 (600 MHz,  $C_3H_5N-d_5$ ).

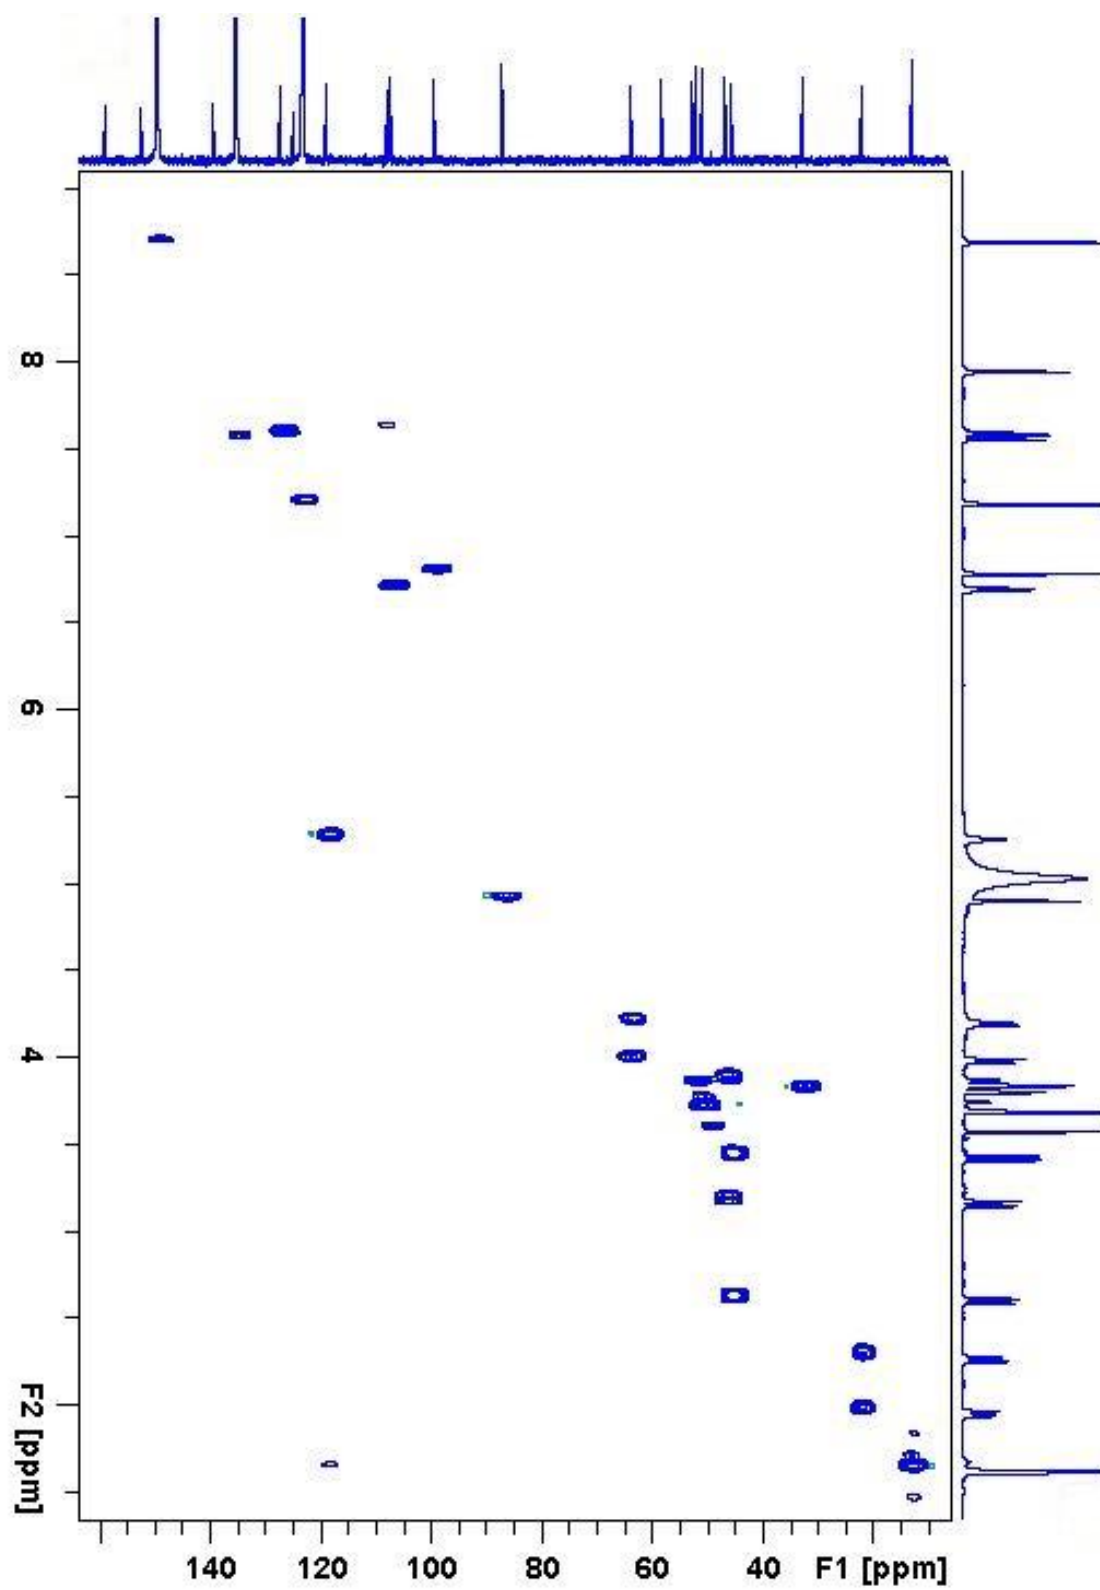

Figure S4. HMBC spectrum of compound 1 (600 MHz,  $C_5H_5N-d_5$ ).

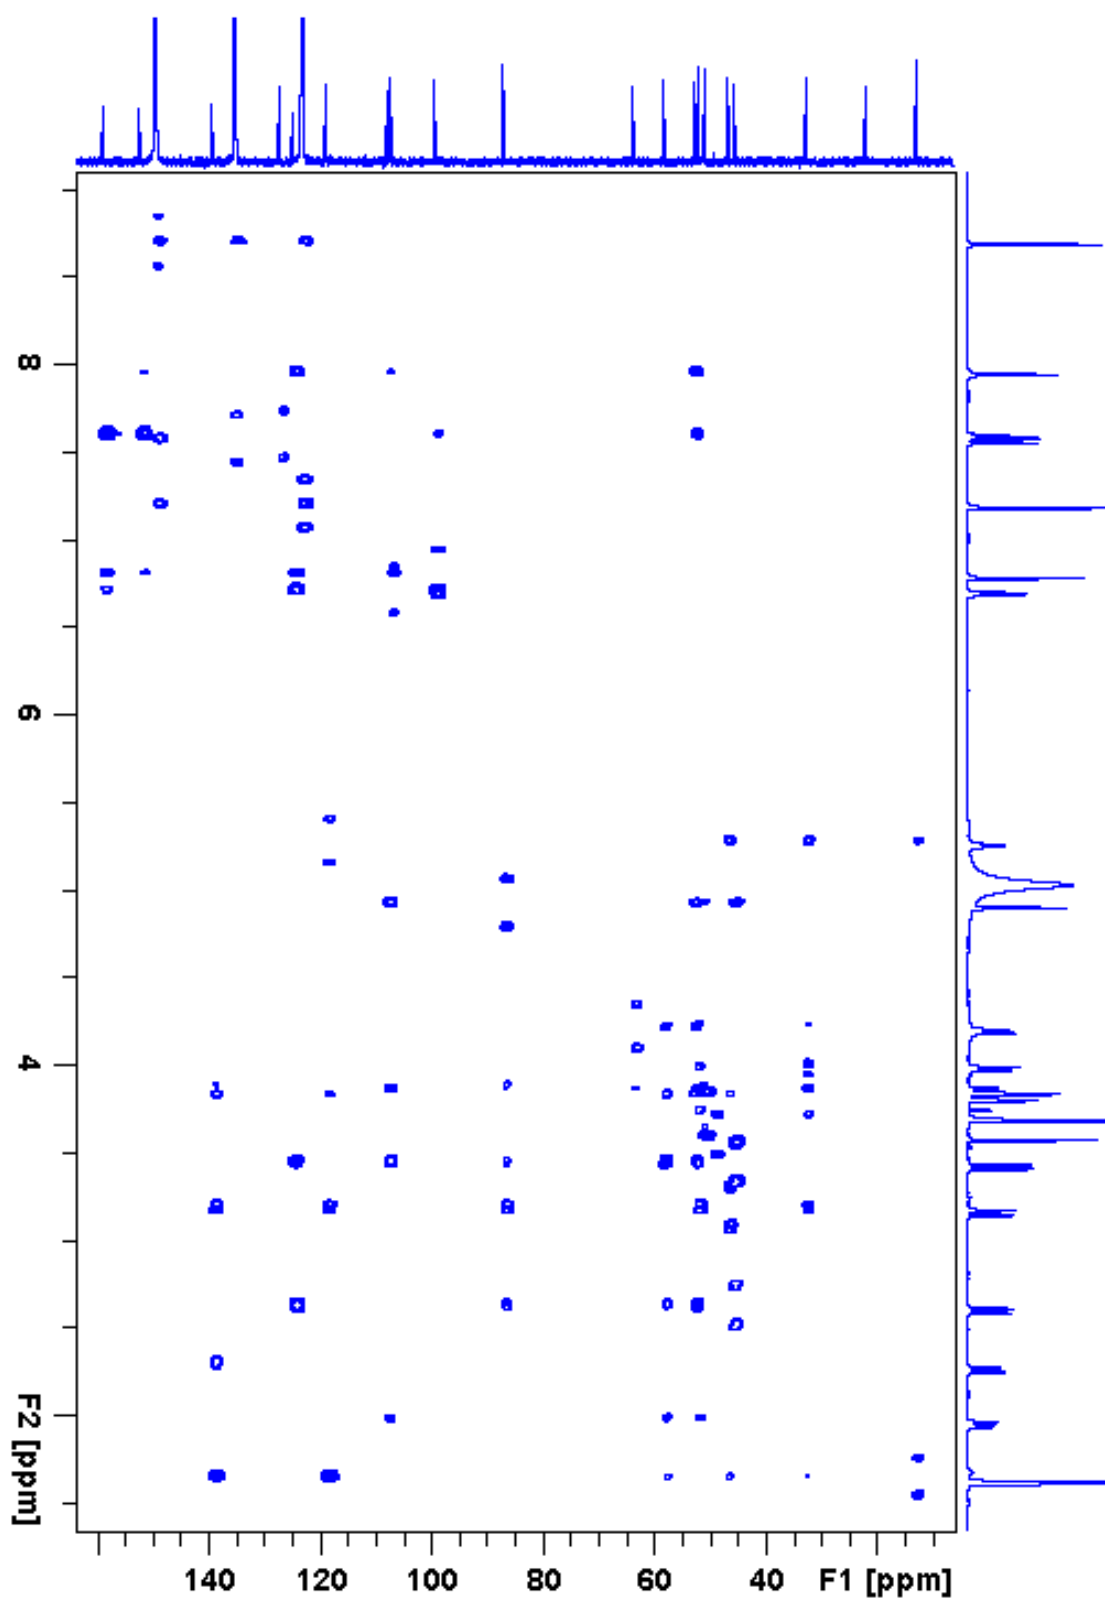

**Figure S5.** NOESY spectrum of compound **1** (600 MHz,  $C_5H_5N-d_5$ ).

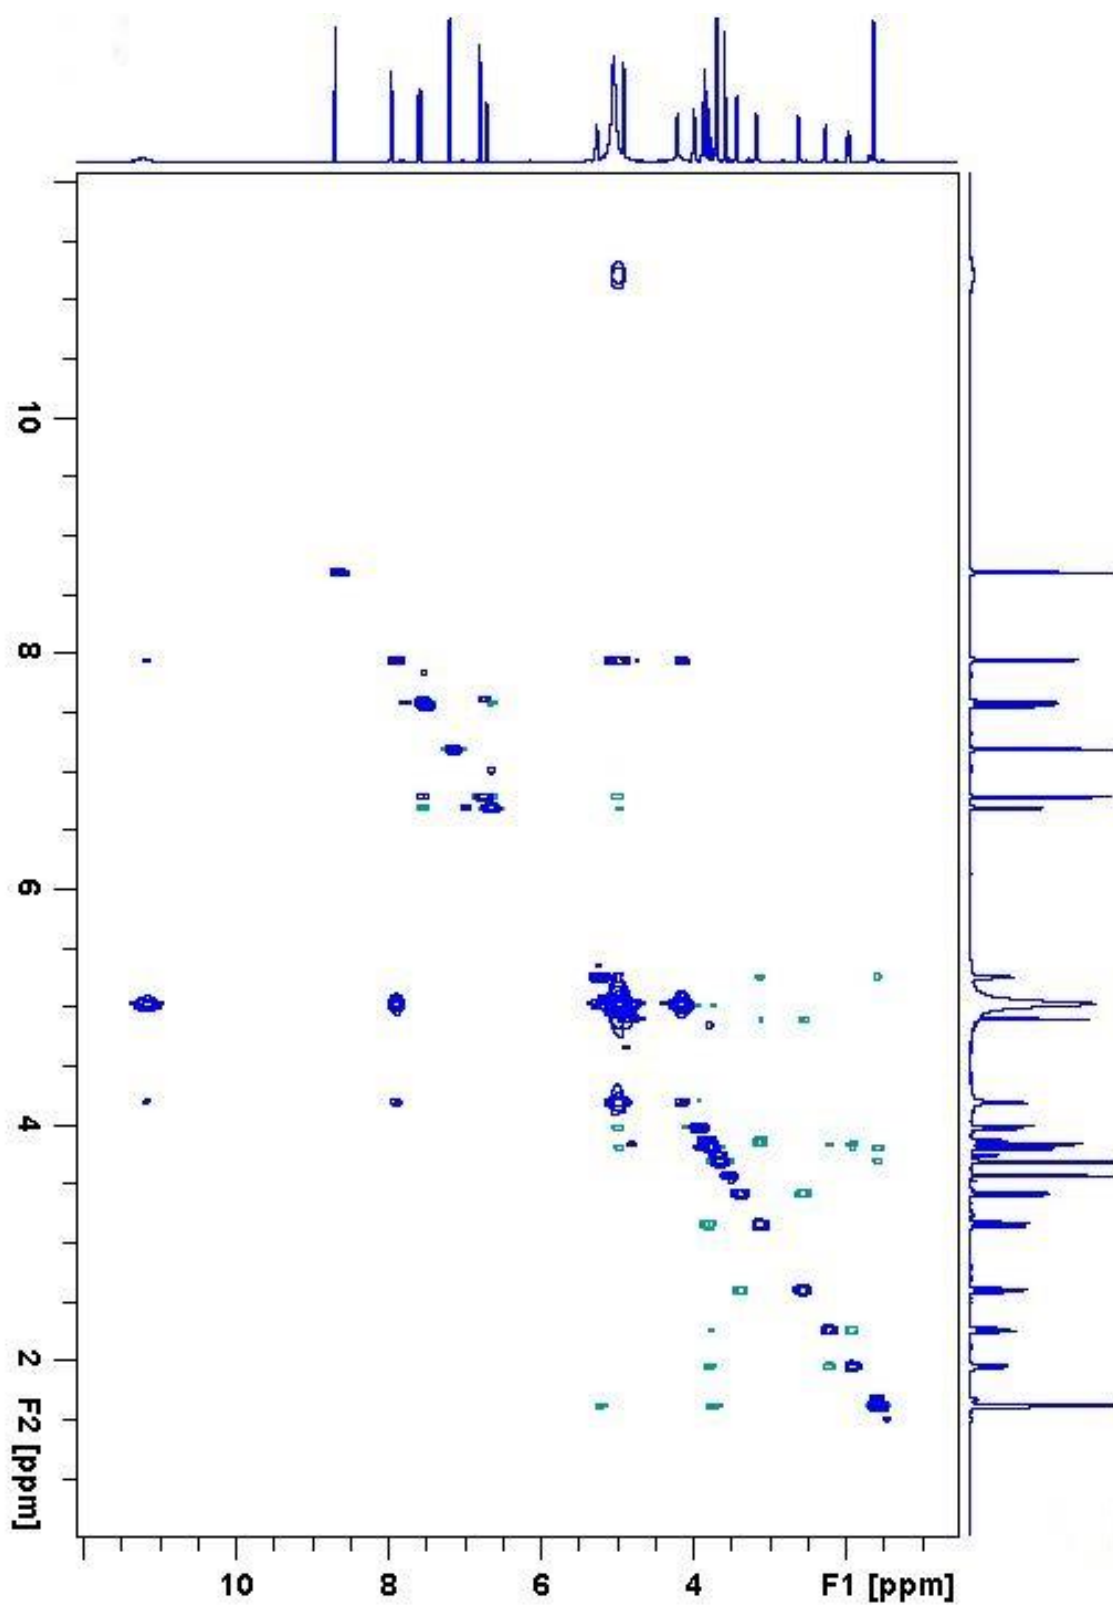

Figure S6. <sup>1</sup>H NMR spectrum of compound 2 (600 MHz, MeOH-*d*<sub>4</sub>).

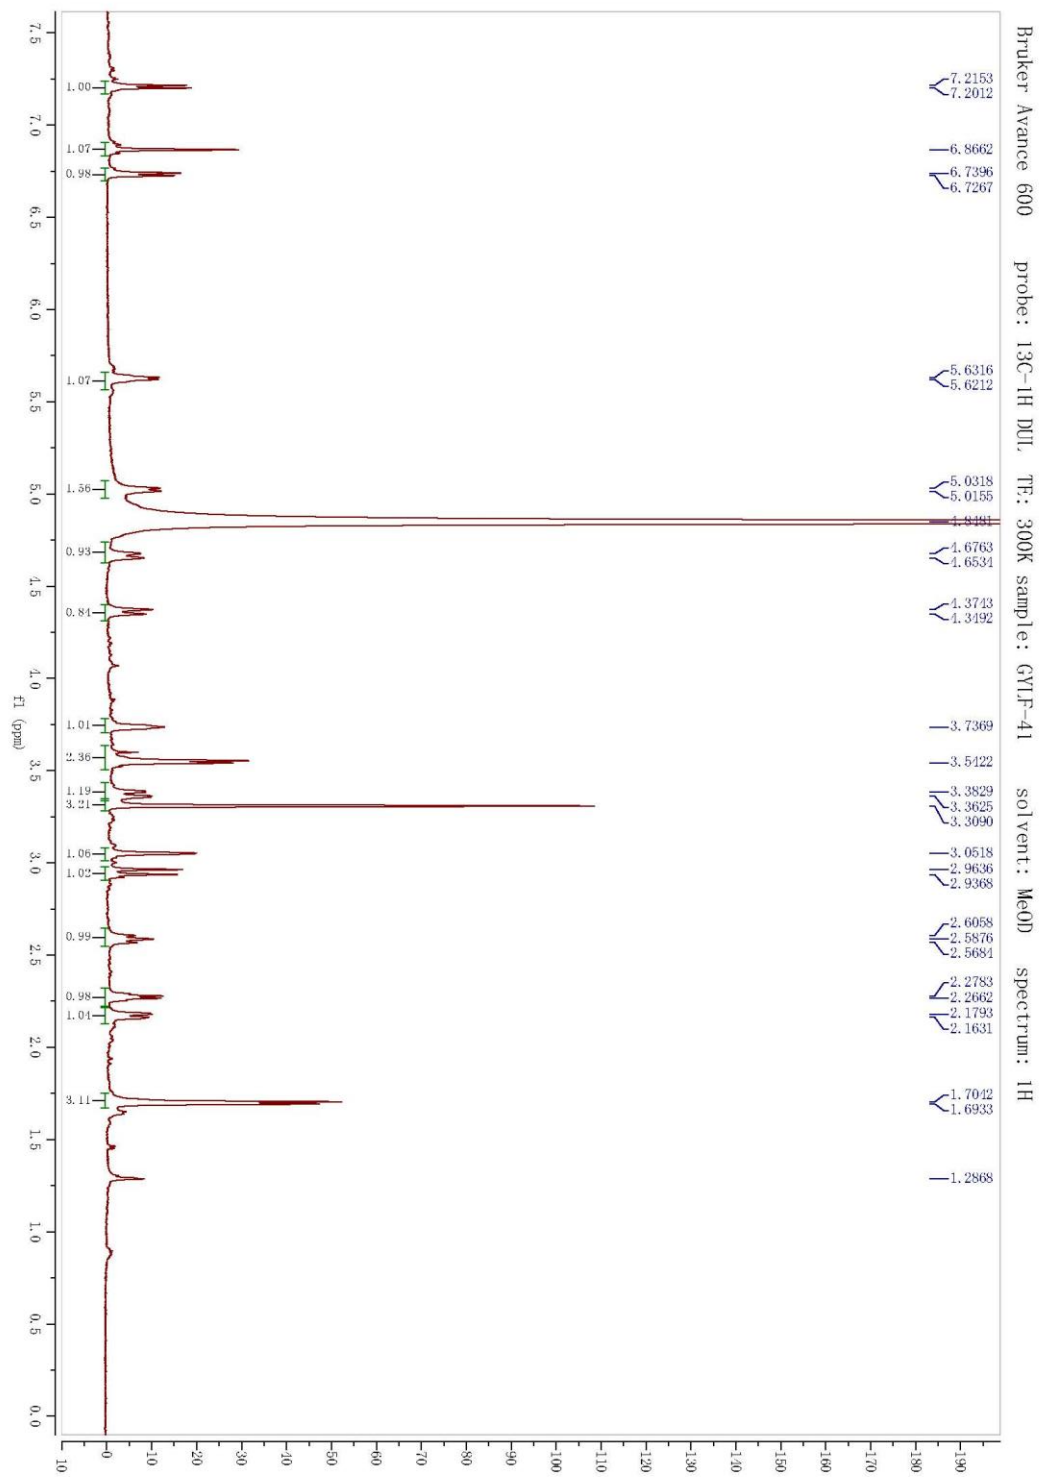



Figure S7.  $^{13}\text{C}$  NMR spectrum of compound **2** (150 MHz,  $\text{MeOH-}d_4$ ).

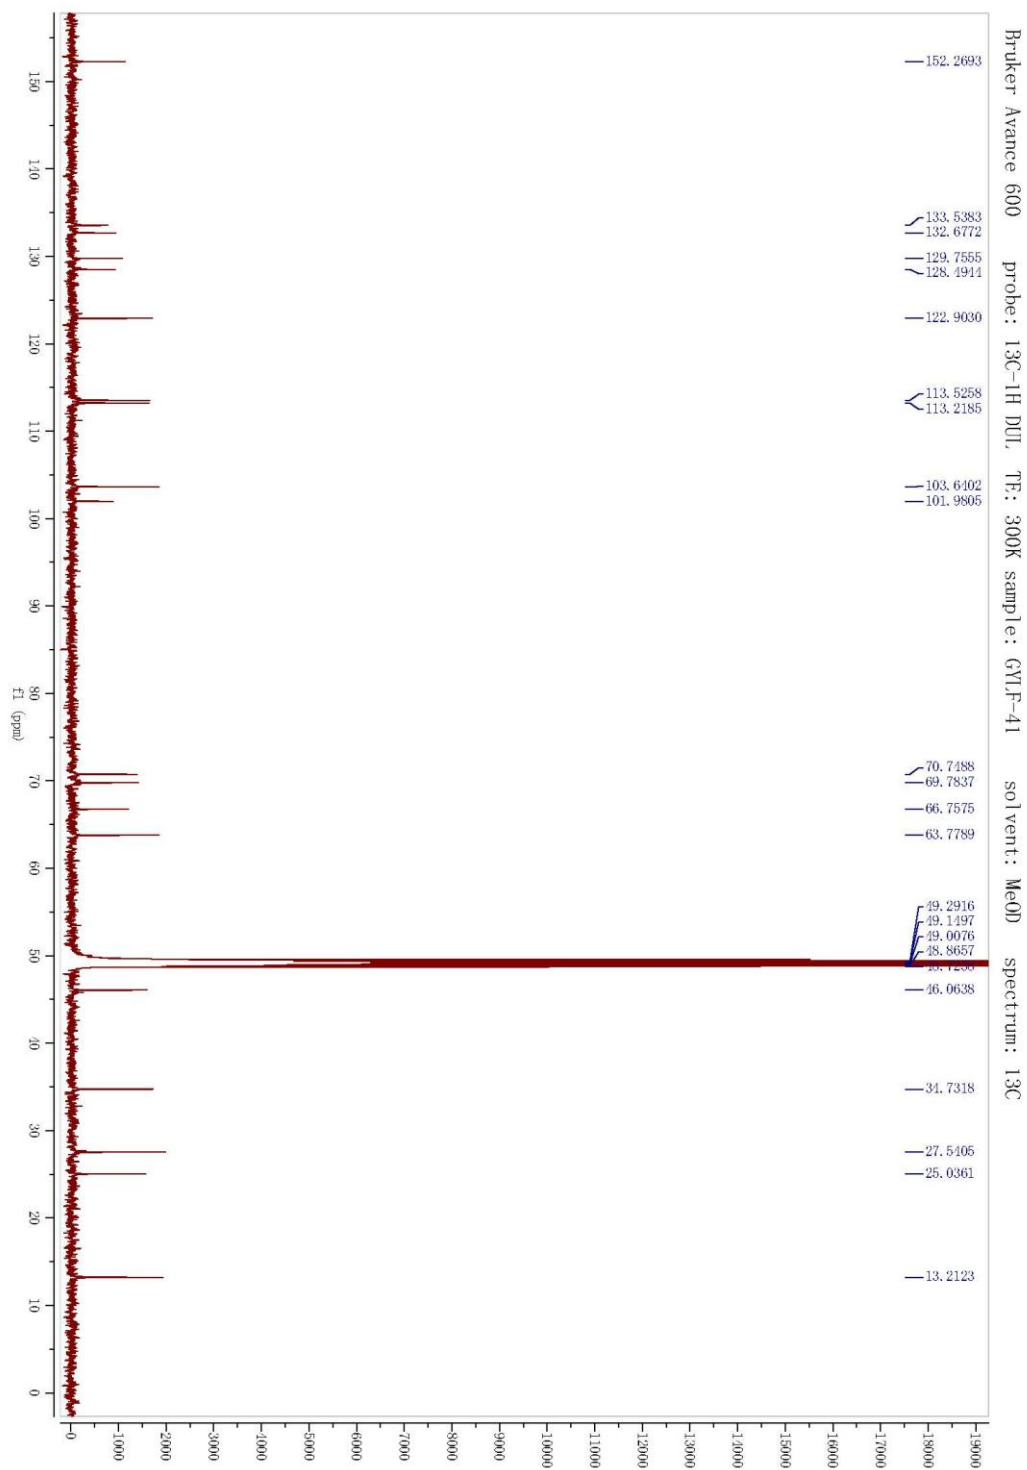

Figure S8. HSQC spectrum of compound 2 (600 MHz, MeOH- $d_4$ ).

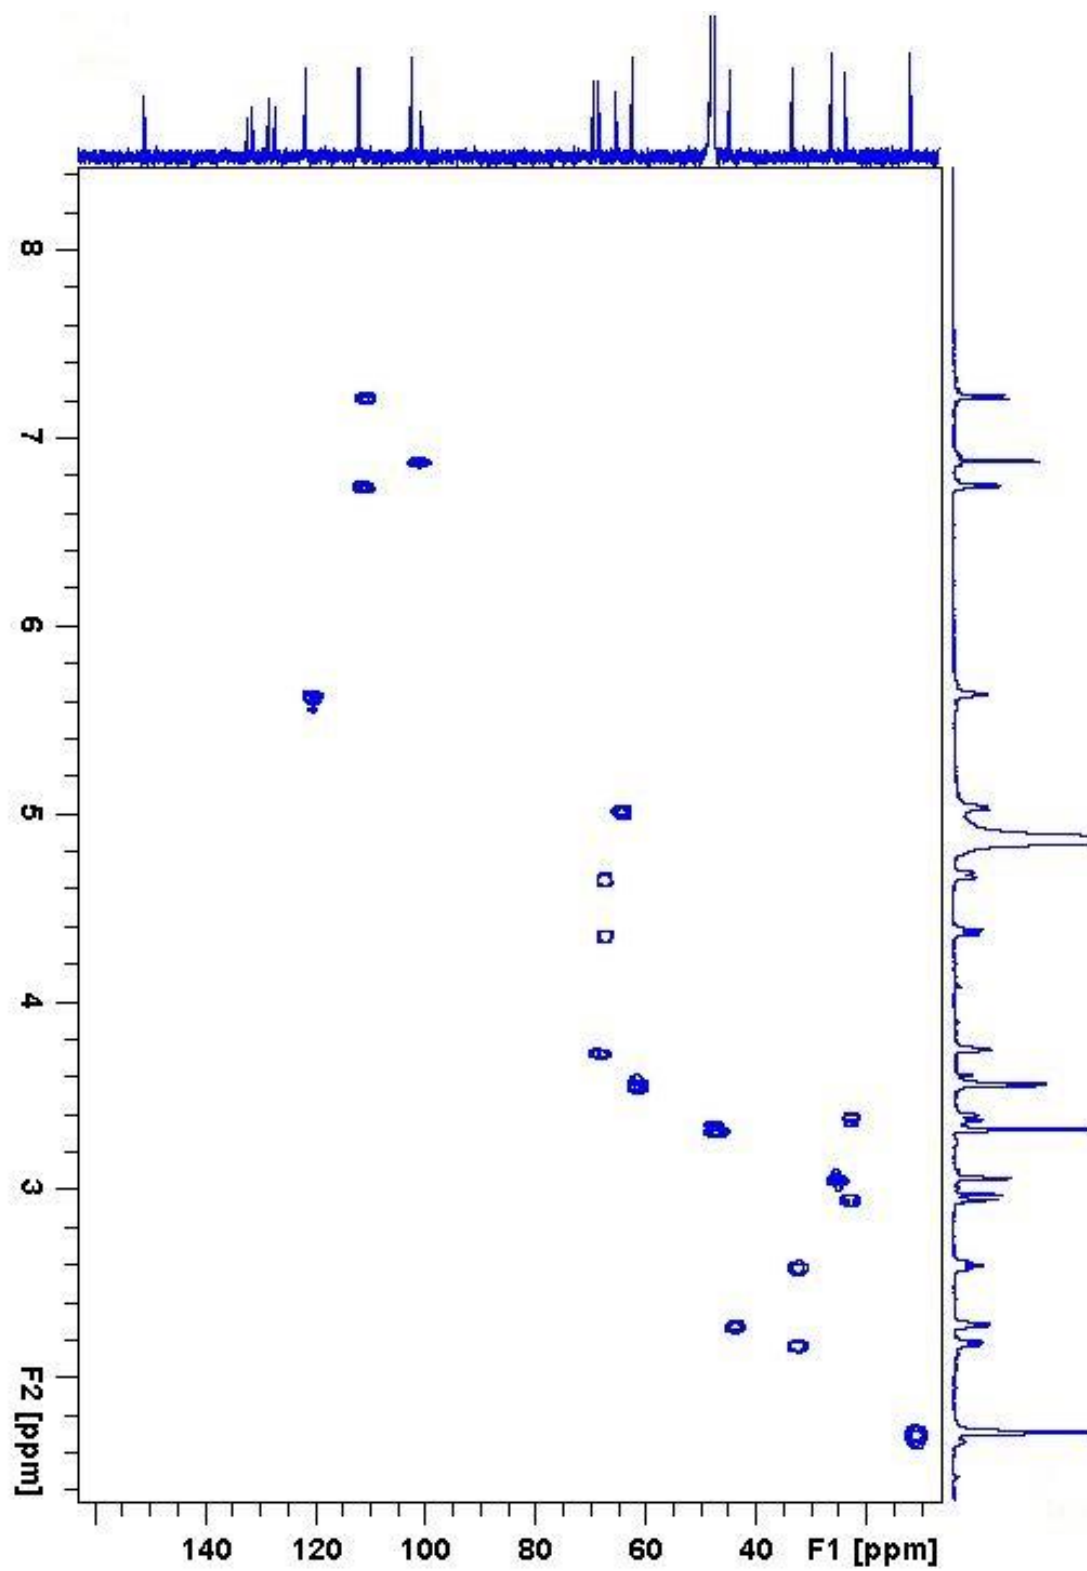

Figure S9. HMBC spectrum of compound 2 (600 MHz, MeOH- $d_4$ ).

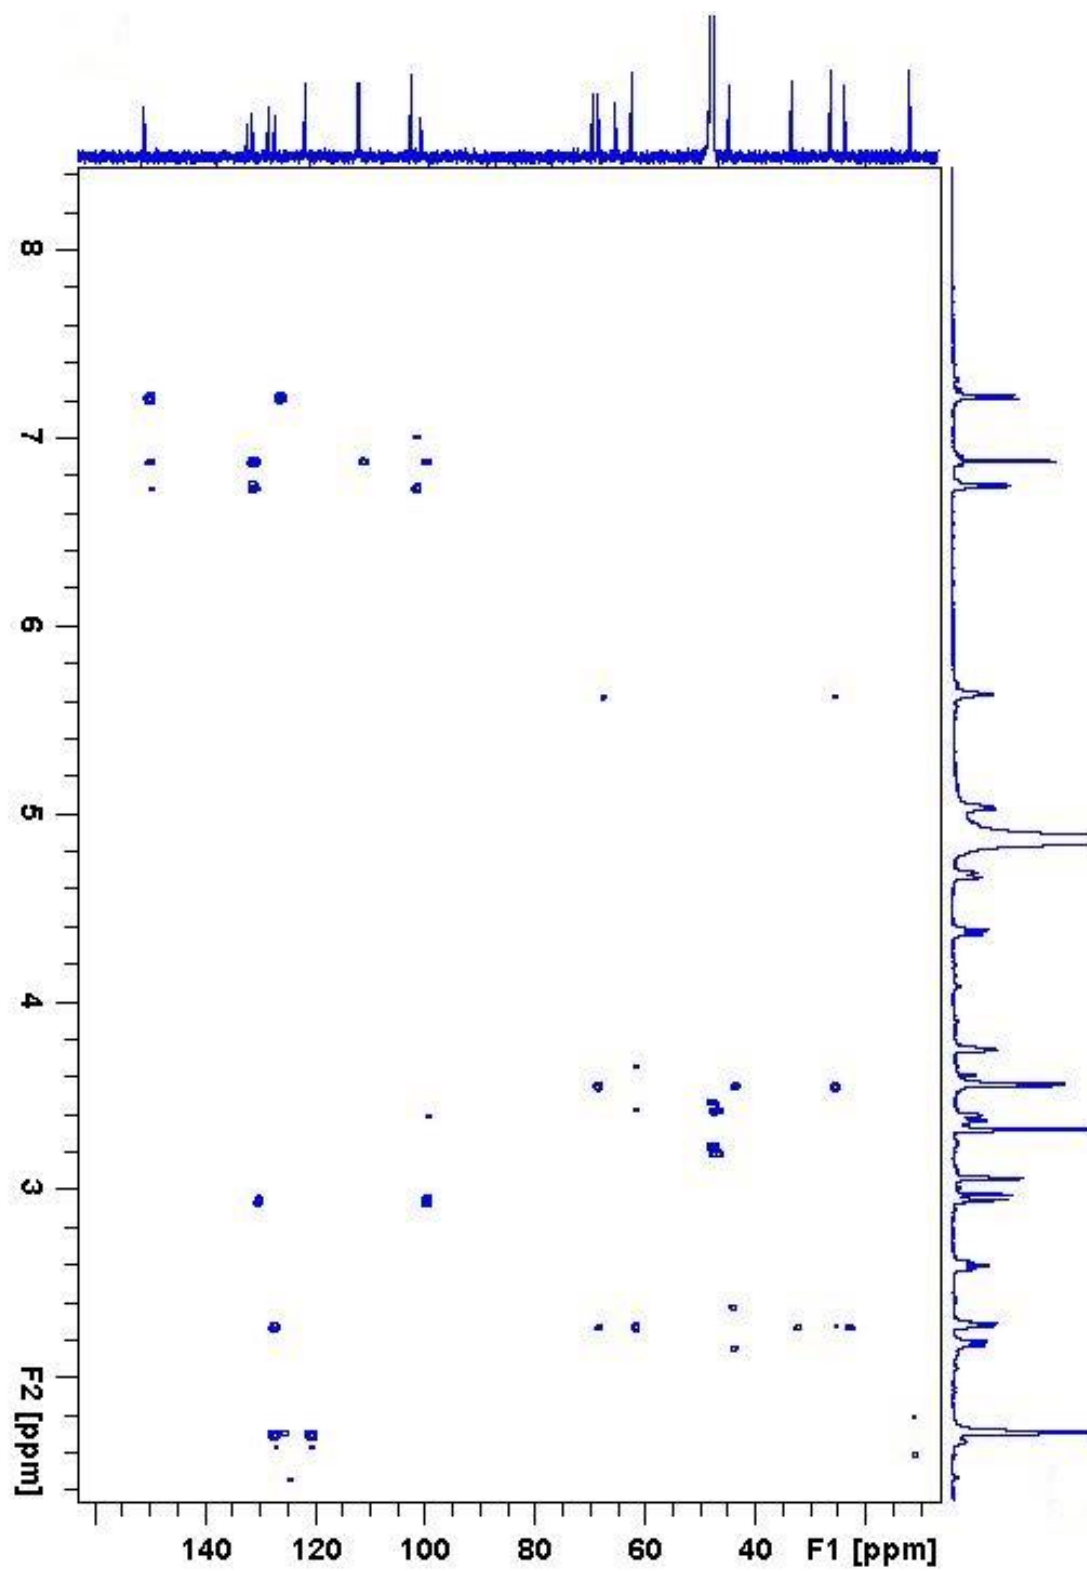

Figure S10. NOESY spectrum of compound 2 (600 MHz, MeOH- $d_4$ ).

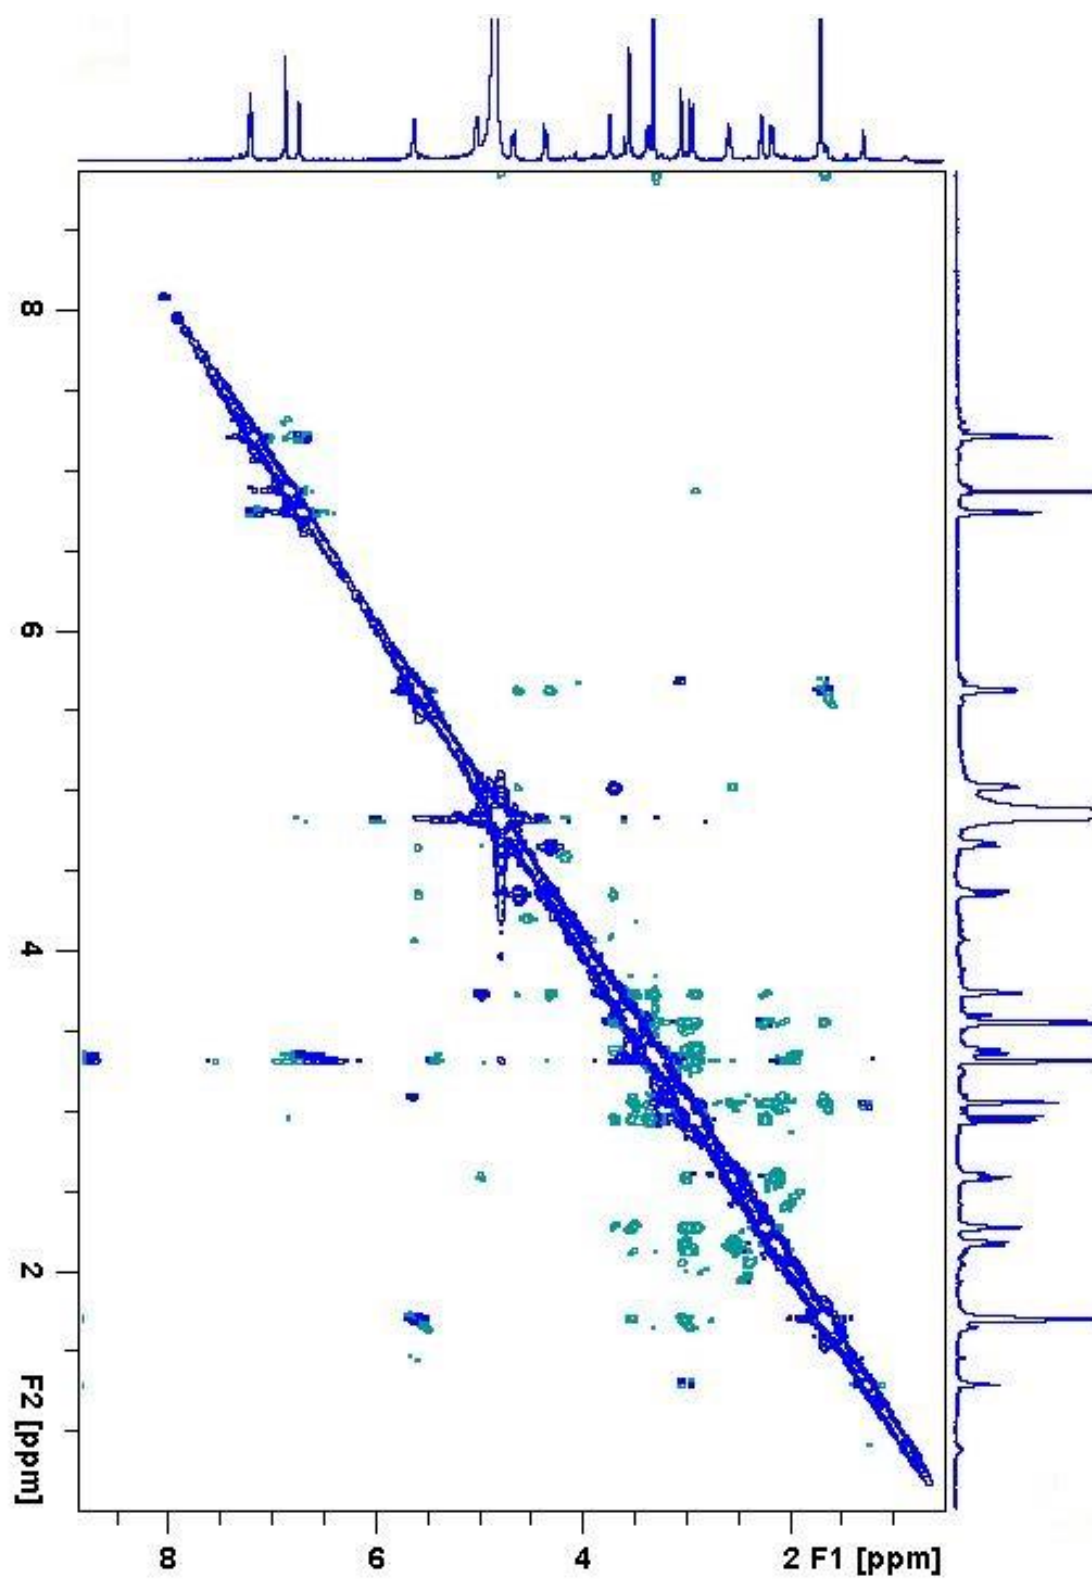

Figure S11. <sup>1</sup>H NMR spectrum of compound 3 (600 MHz, MeOH-d<sub>4</sub>).

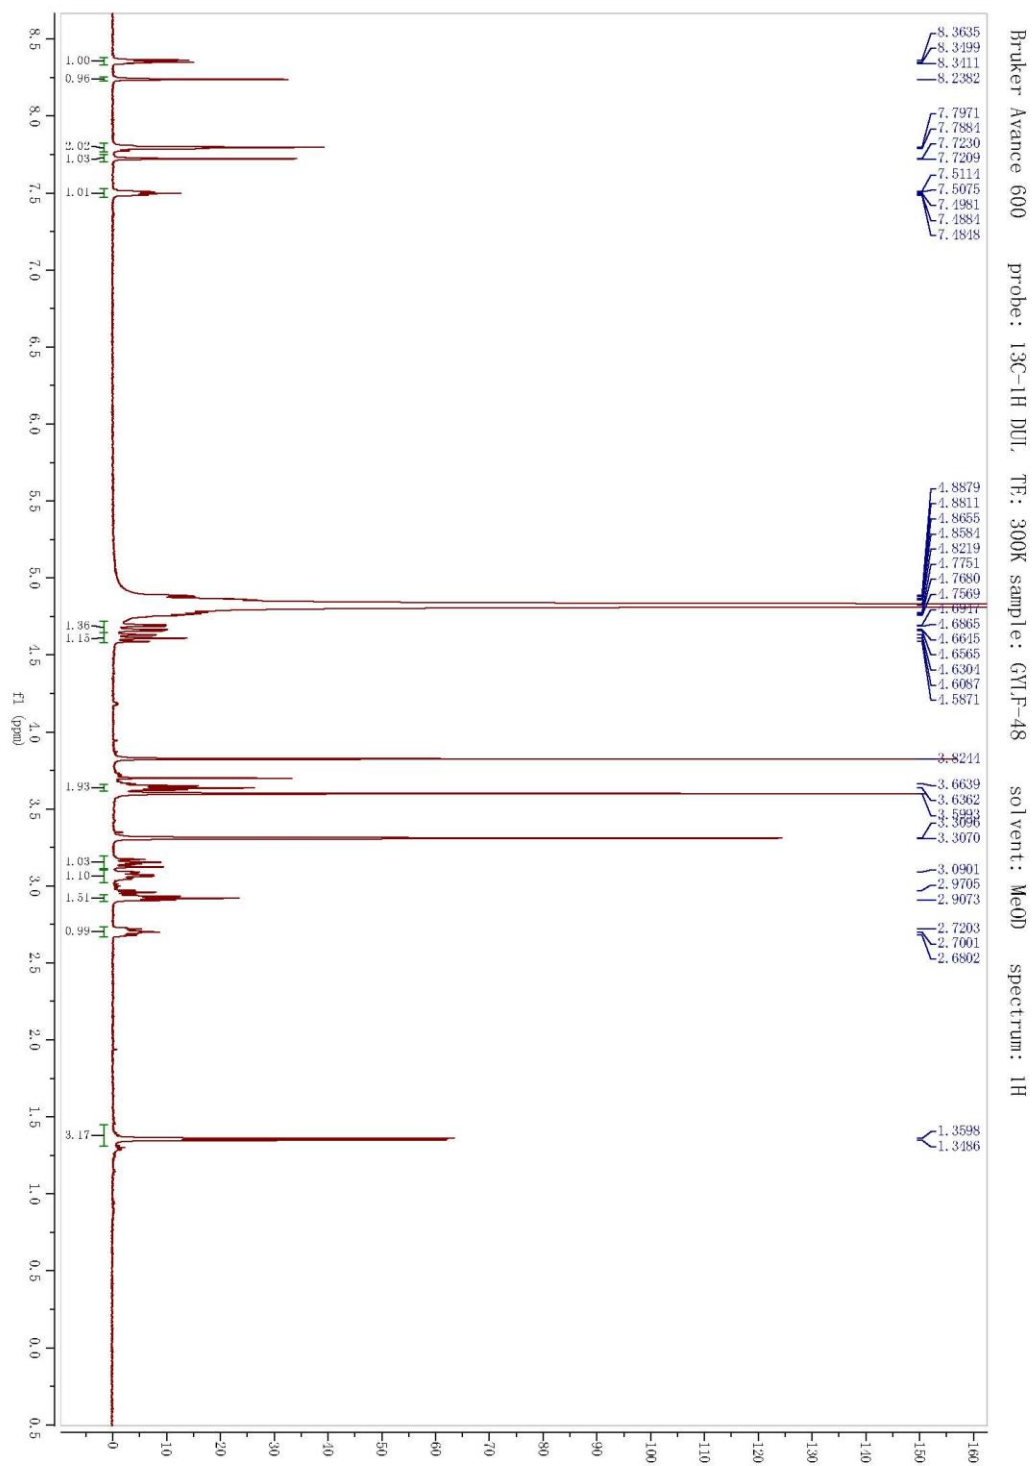

Figure S12.  $^{13}\text{C}$  NMR spectrum of compound **3** (150 MHz,  $\text{MeOH-}d_4$ ).

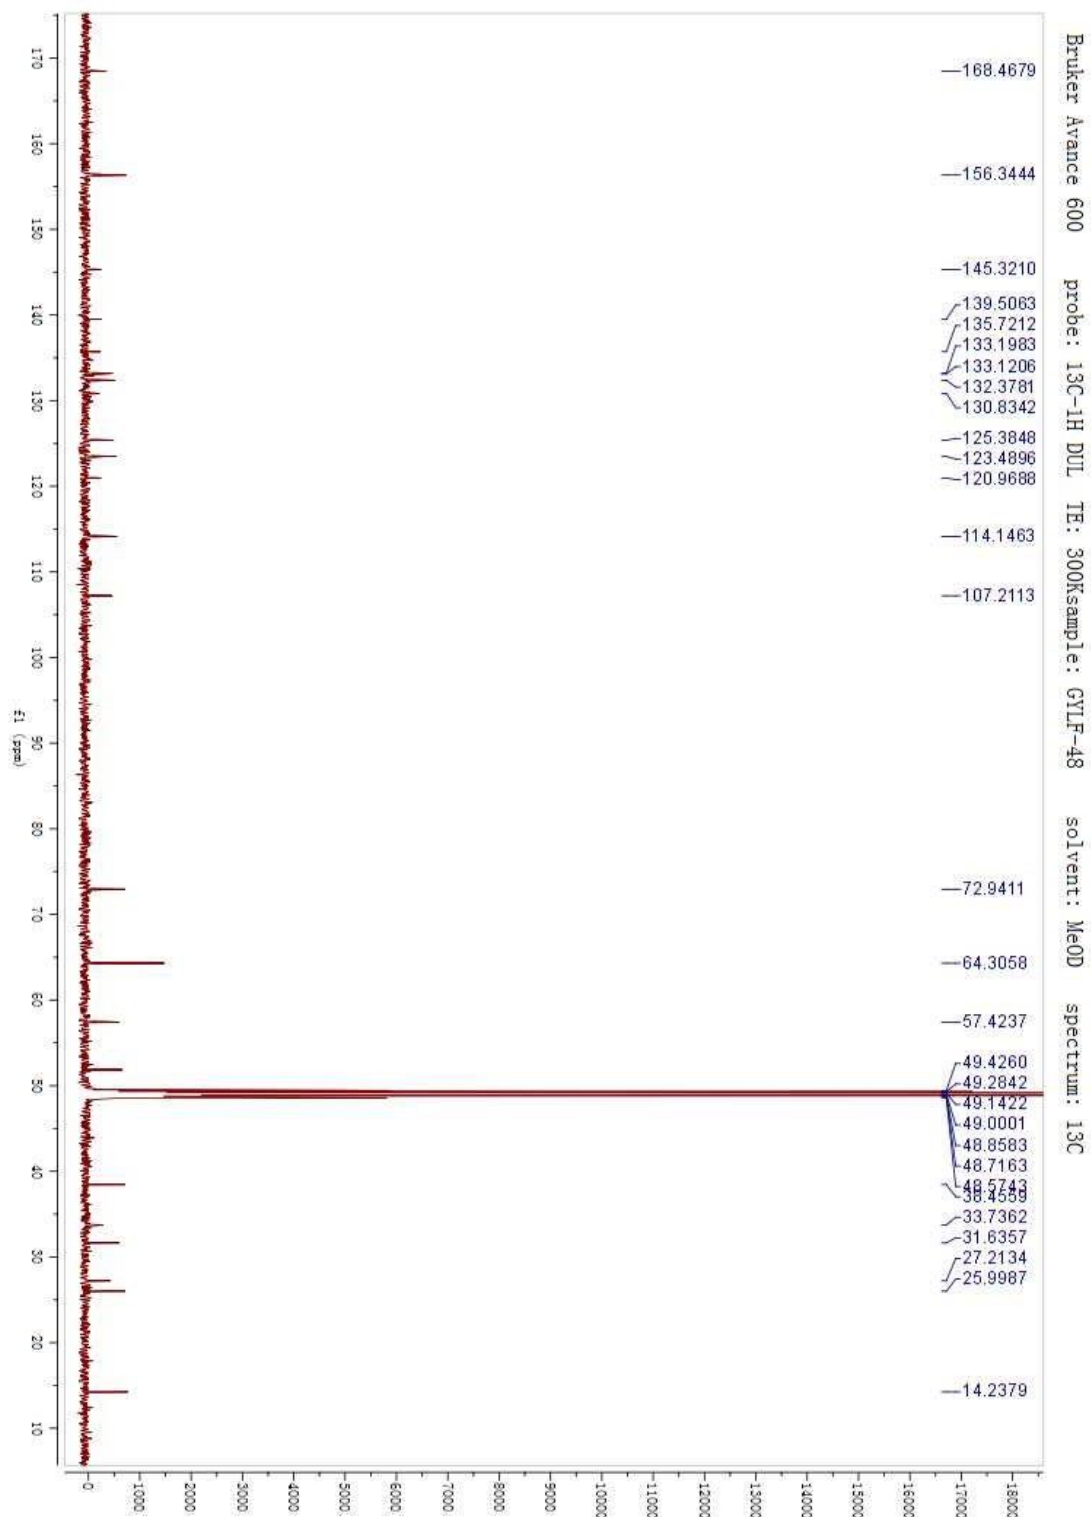

Figure S13. HSQC spectrum of compound 3 (600 MHz, MeOH-*d*<sub>4</sub>).

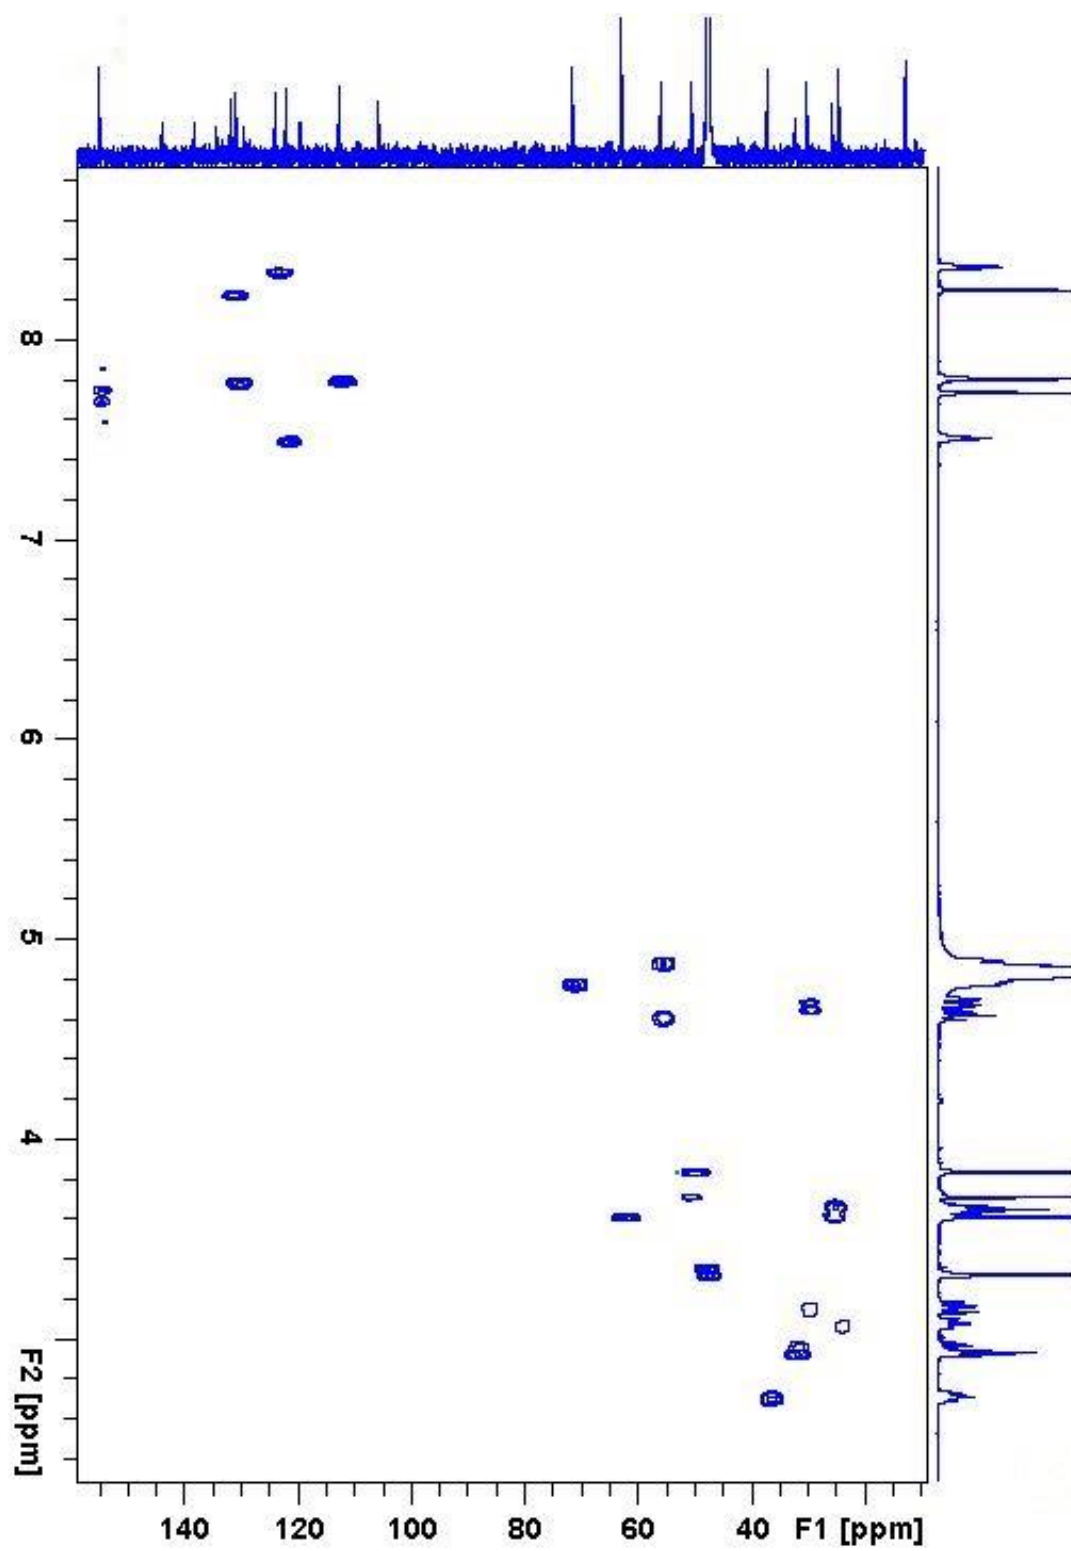

Figure S14. HMBC spectrum of compound 3 (600 MHz, MeOH-*d*<sub>4</sub>).

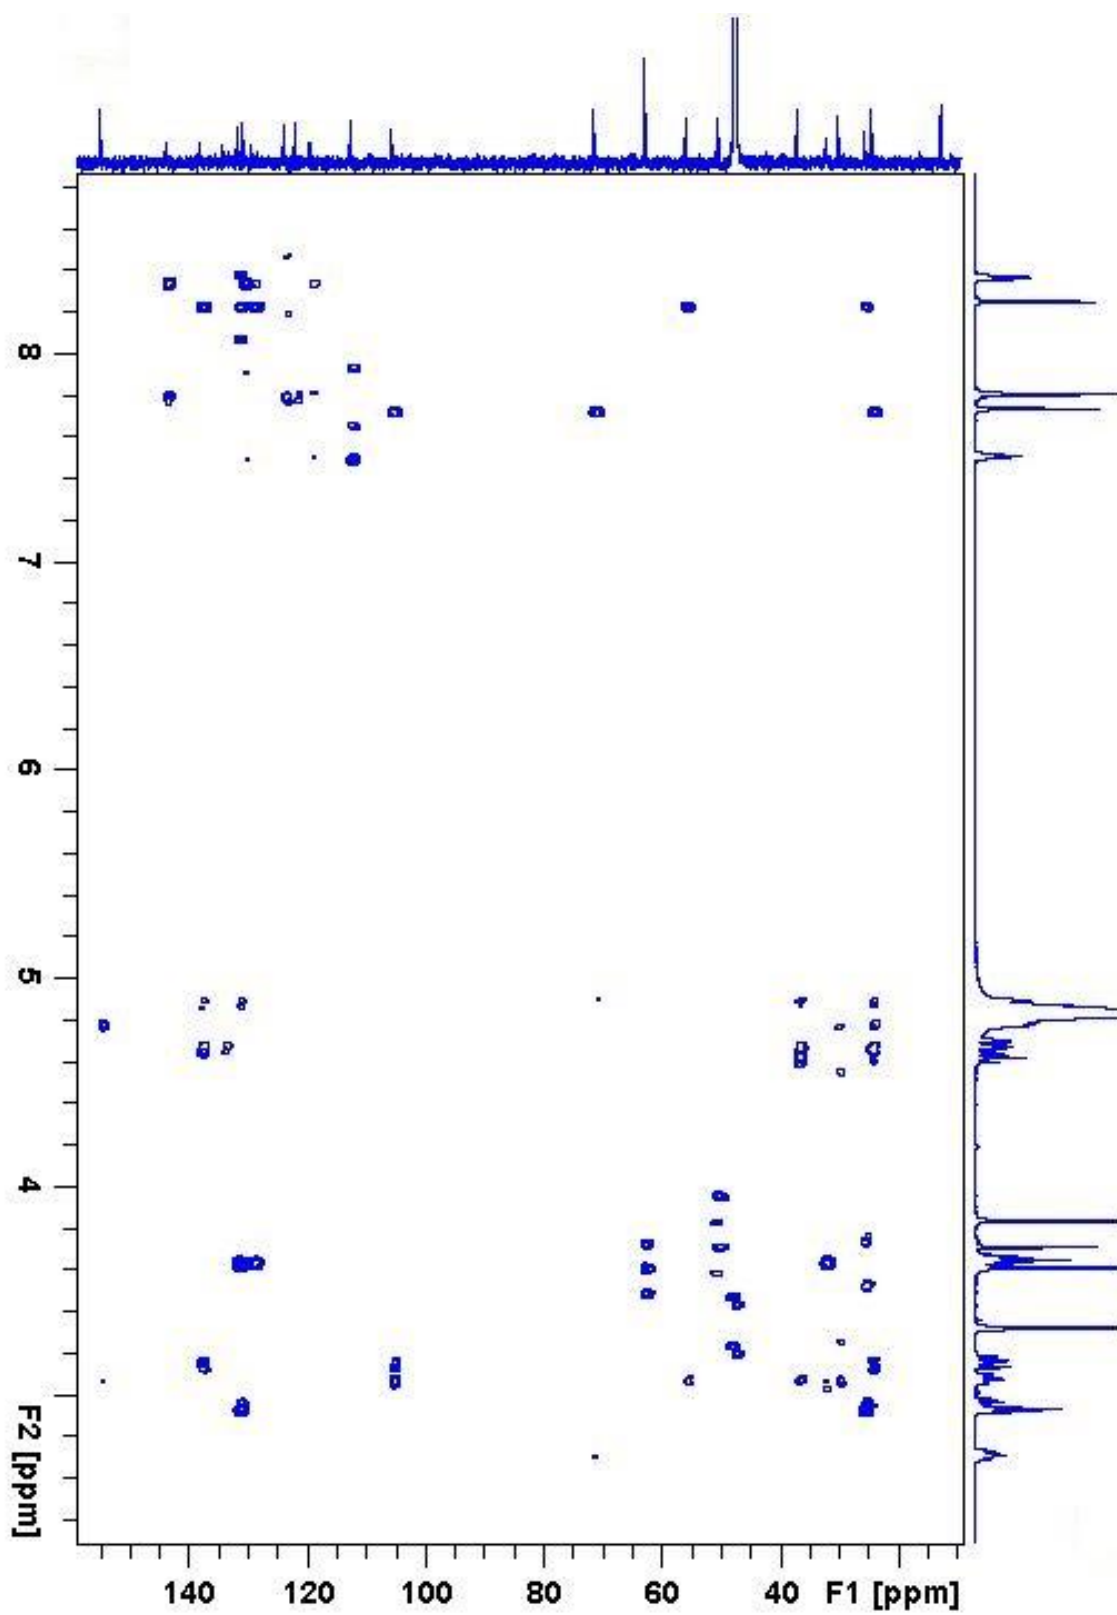



**Figure S15.** NOESY spectrum of compound **3** (600 MHz, MeOH-*d*<sub>4</sub>).

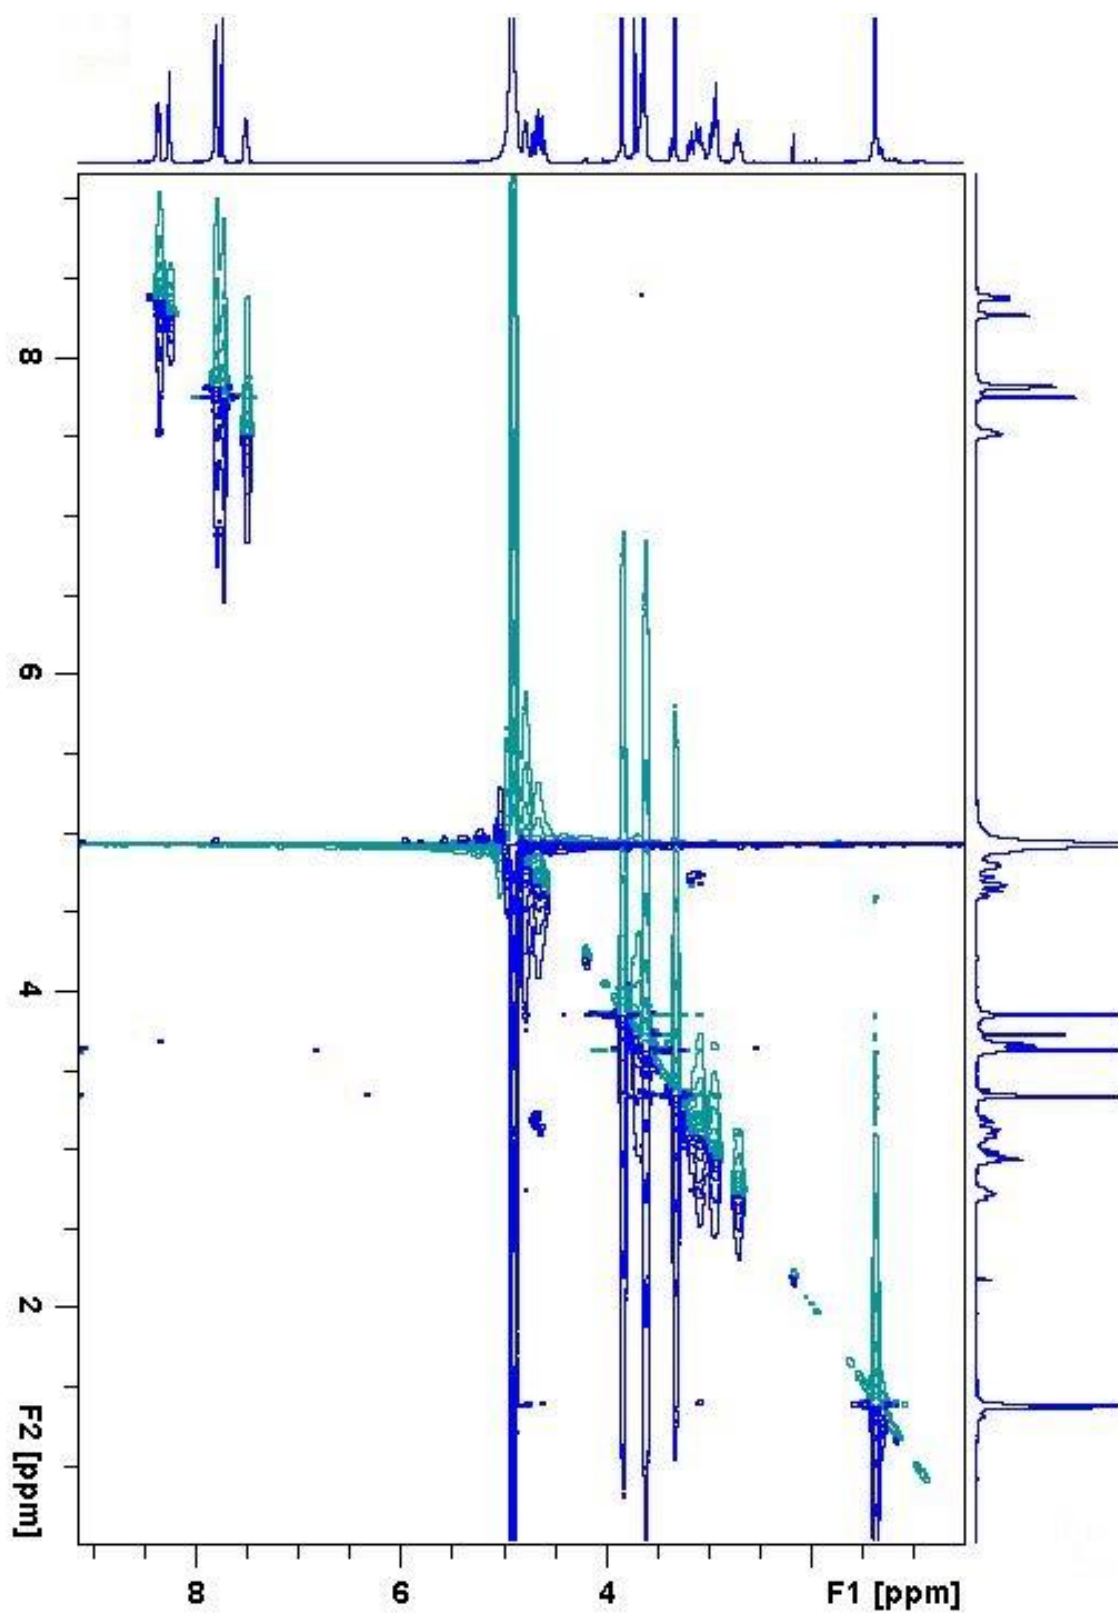

Supplement: molecules-24-04574-s001.pdf [file molecules-24-04574-s001.pdf]
